# Supplementary material
Source: MDPI journal article supplement (https://www.mdpi.com/2072-4292/12/7/1141)
Supplement: s1 [file s1]

## Supplementary Materials

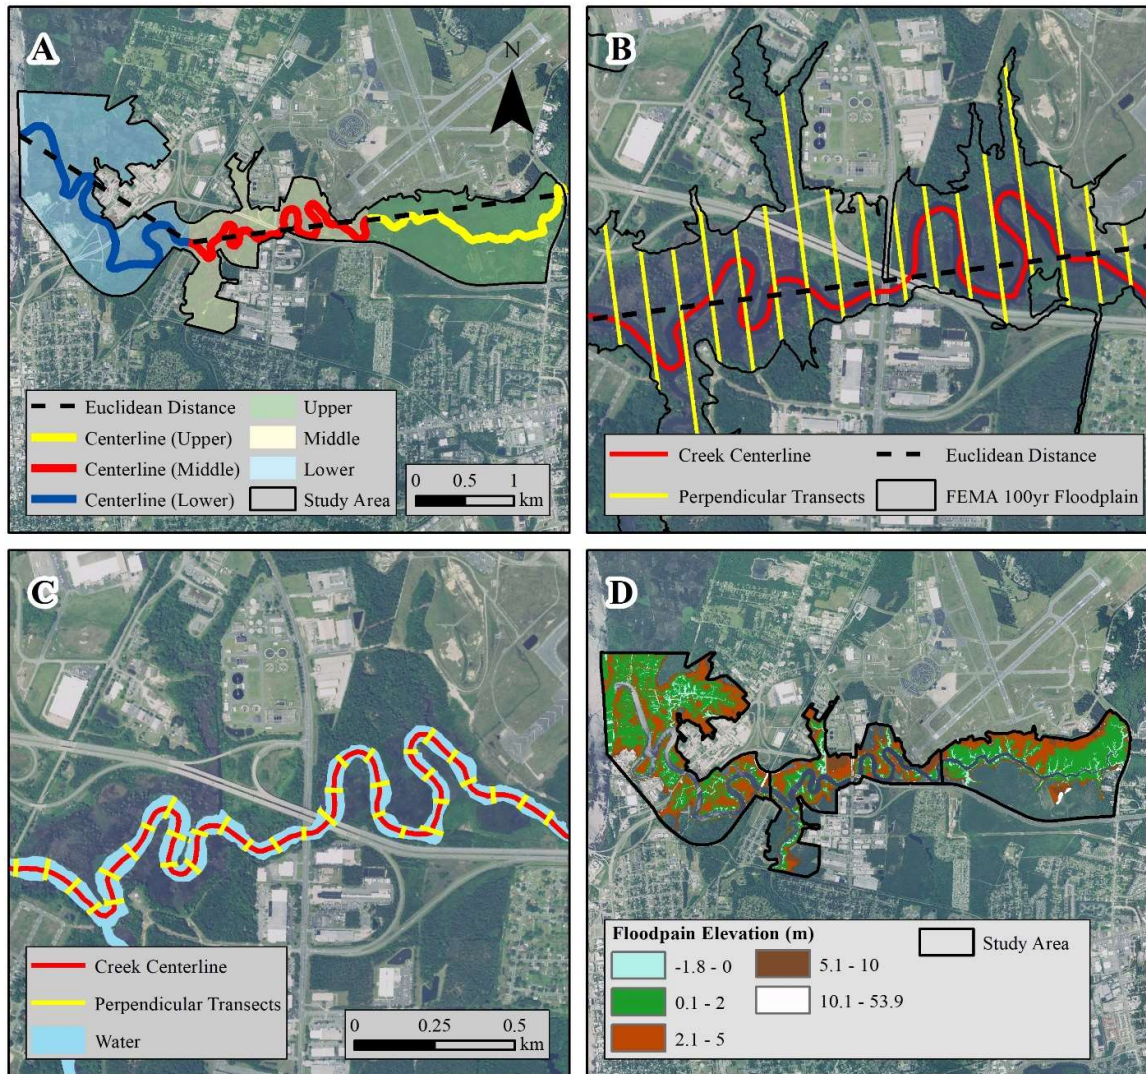

**Figure S1.** Physical geography metrics calculated for each study area: (A) sinuosity or curviness of creek channel, (B) floodplain width, (C) creek width and (D) floodplain elevation. Data Sources: FEMA, US Fish and Wildlife Service, US Geological Society.

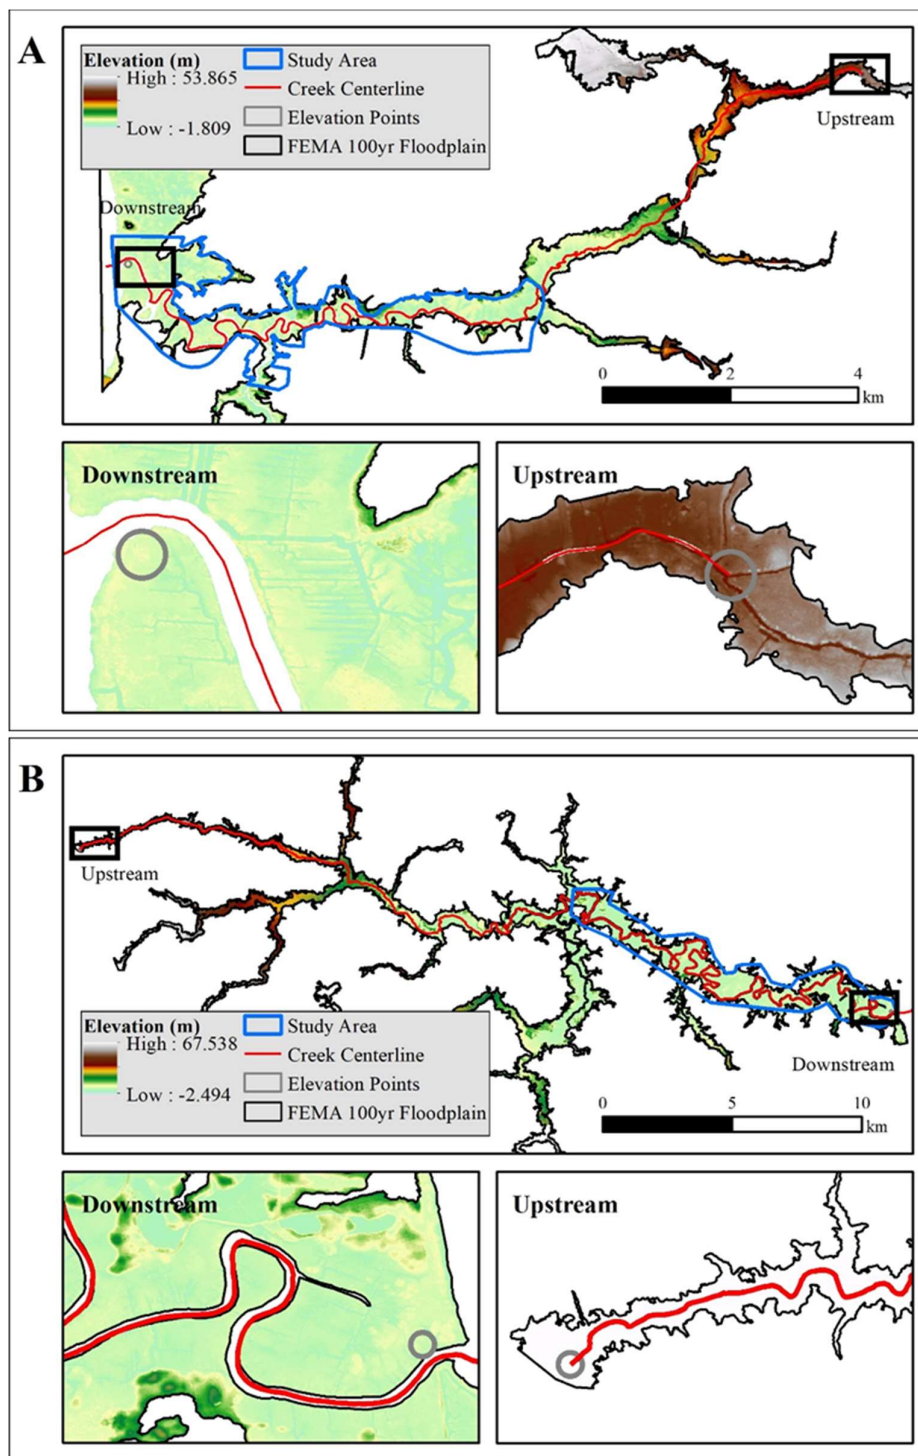

**Figure S2.** Location of upstream and downstream locations used to calculate creek slope for (A) Smith Creek and (B) Town Creek.

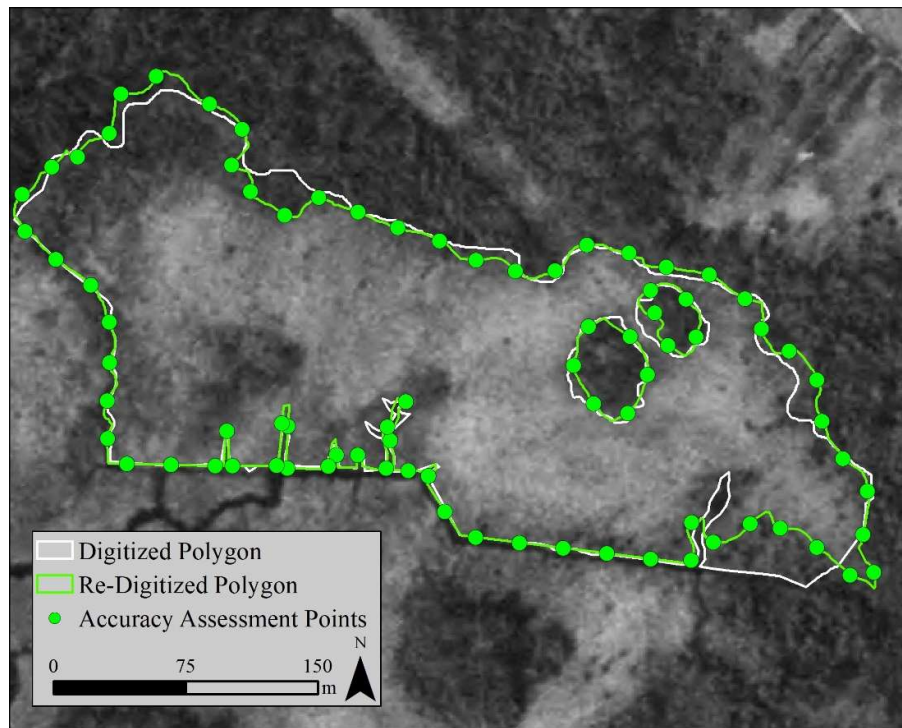

**Figure S3.** Example accuracy assessment where randomly selected polygons were re-digitized and the distance between the original and re-digitized lines was used to calculate digitizing accuracy.



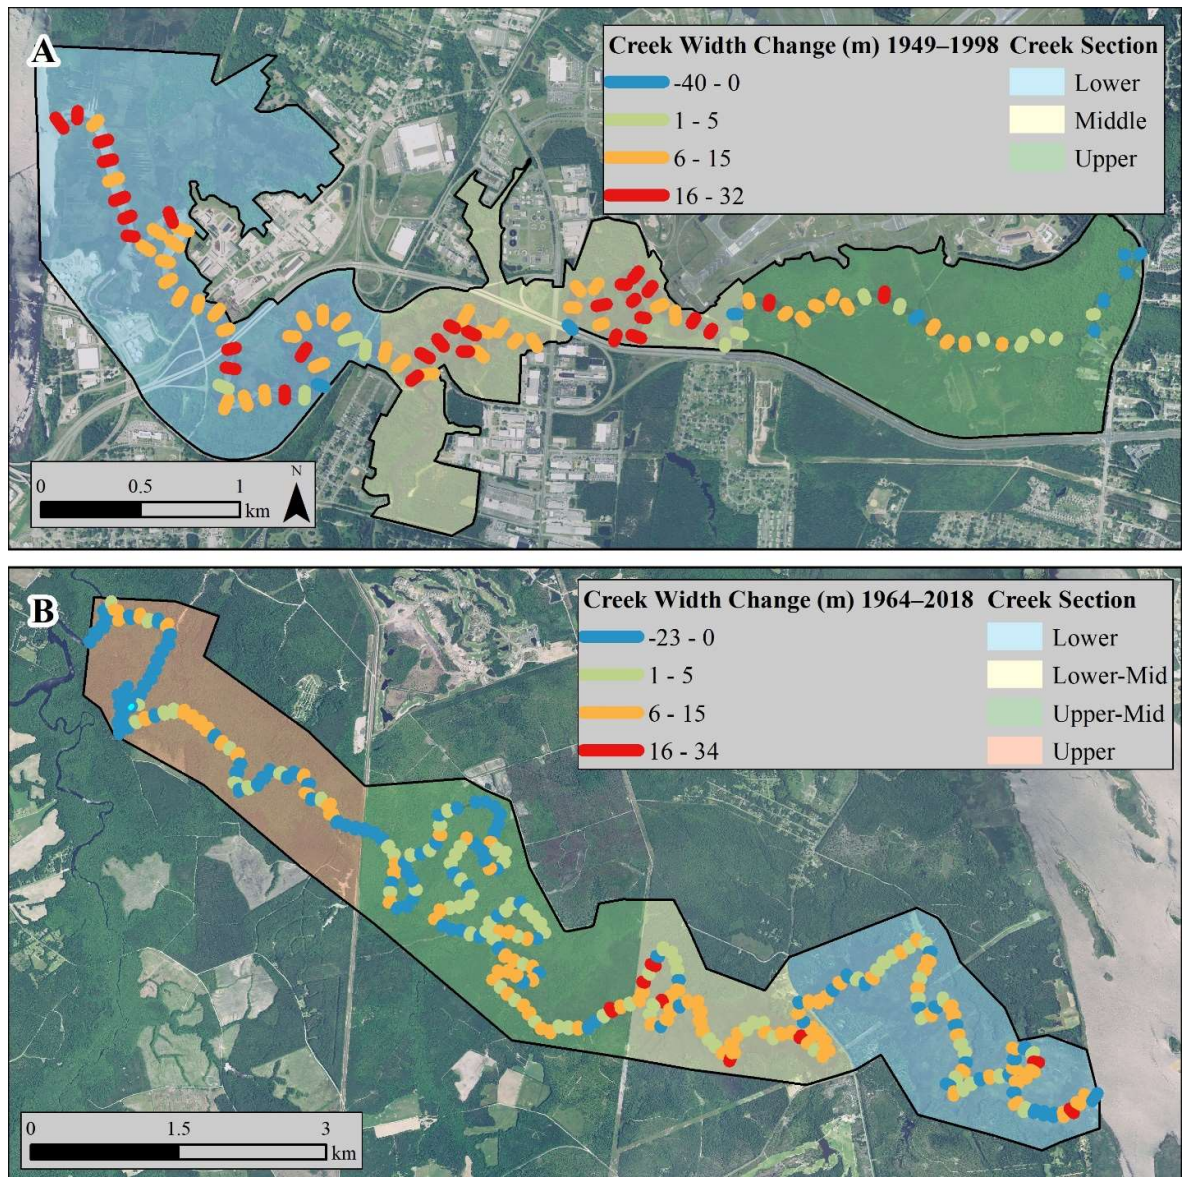

**Figure S4.** Change in creek width from (A) 1949–2018 for Smith Creek and (B) 1964–2018 for Town Creek.

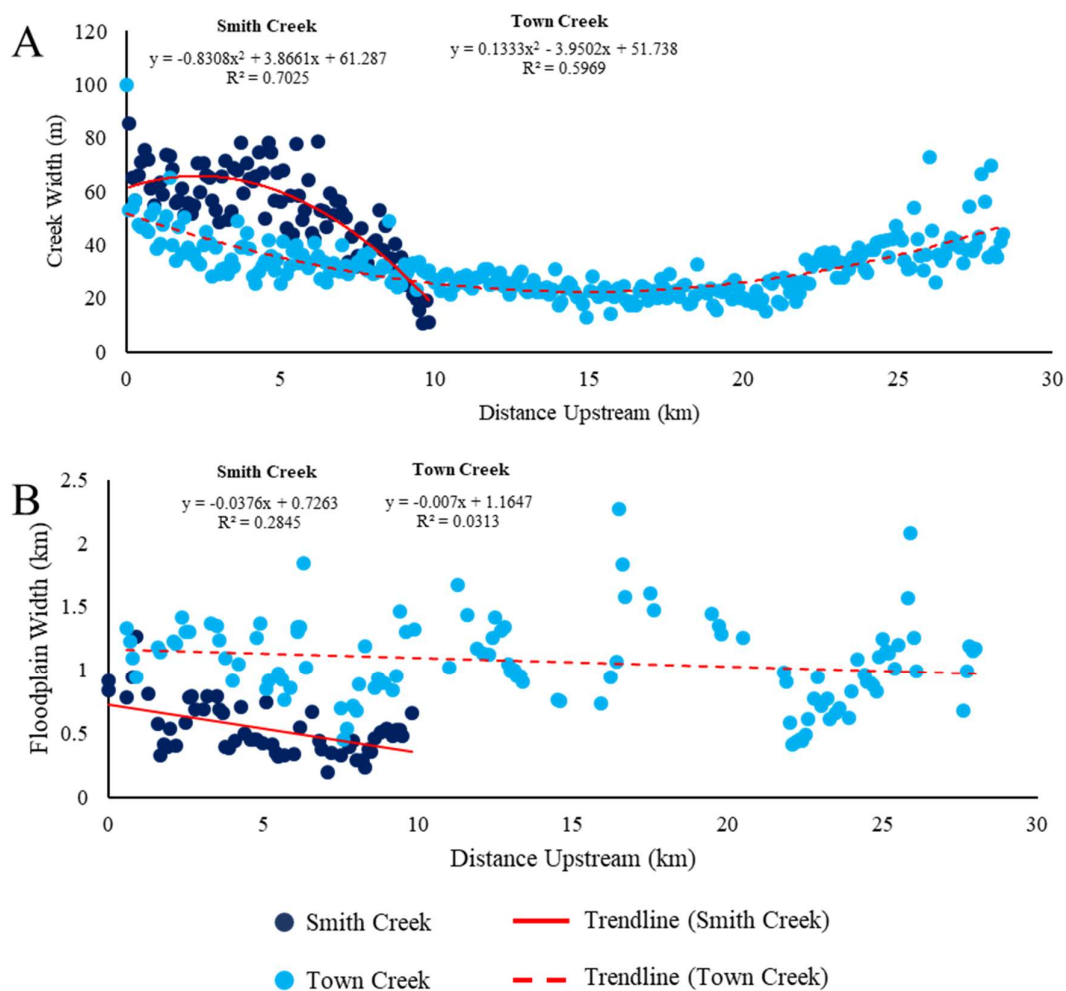

**Figure S5.** Geographic trend in creek metrics where (A) is creek width and (B) is the width of the floodplain. The X-axis is the distance upstream where 0 is located at the mouth of the creek and distance (in km) is further upstream.

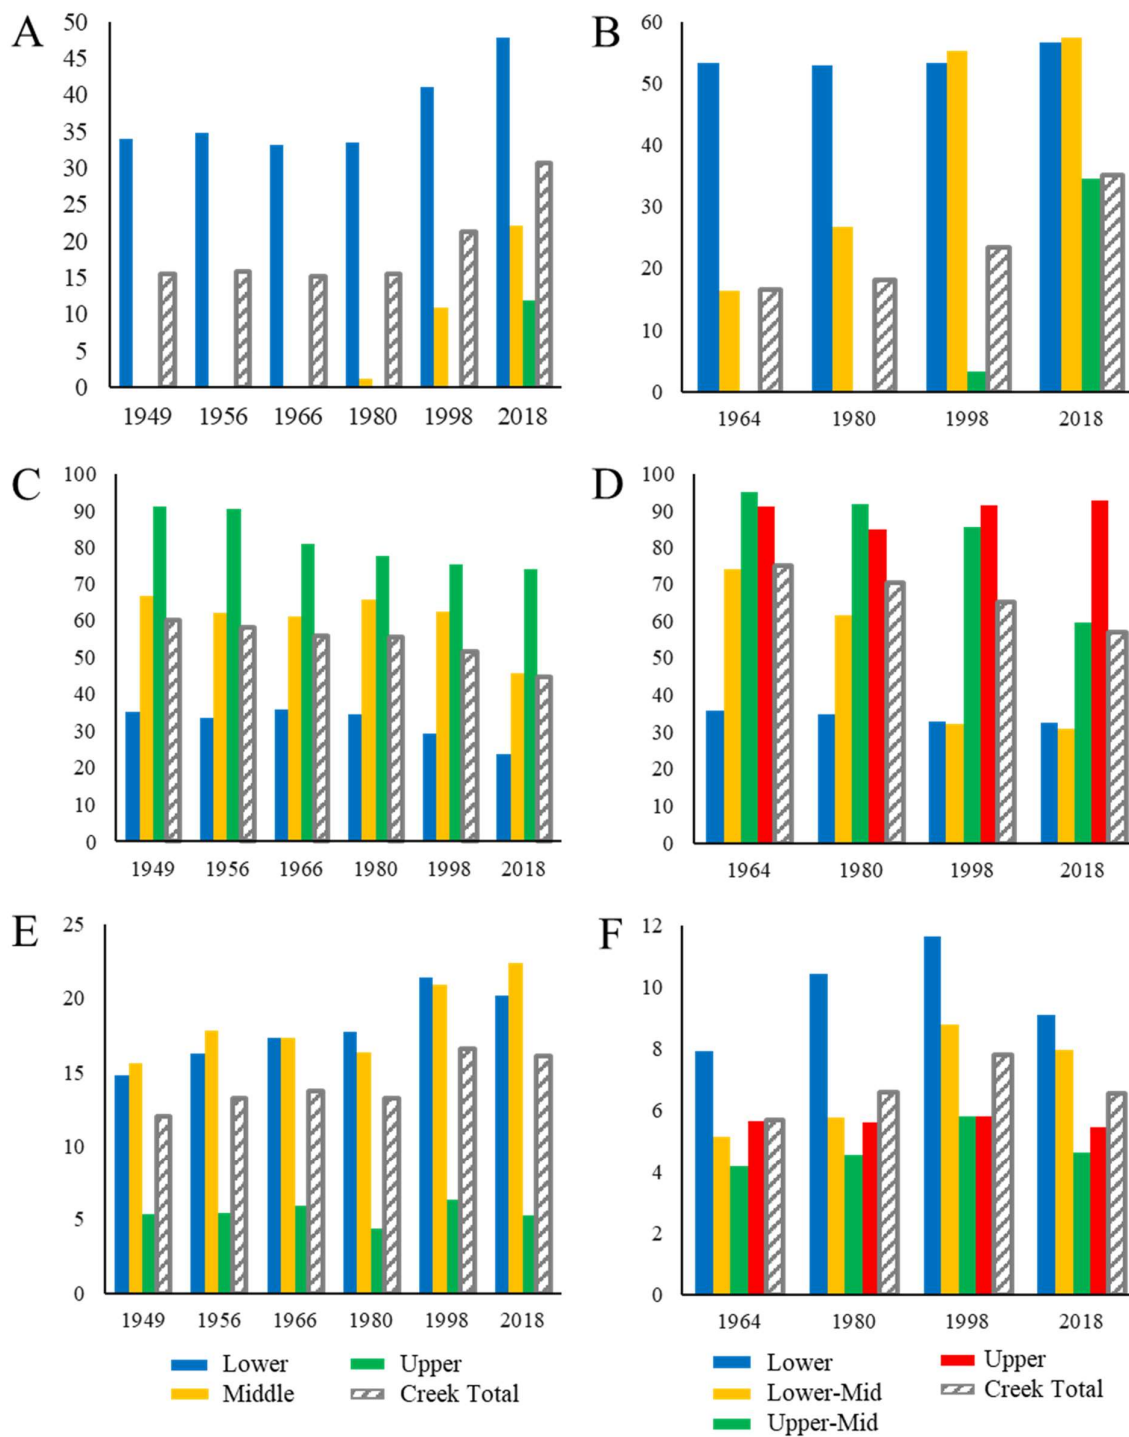

**Figure S6.** Percent land cover type through time by creek segment for Smith Creek (A, C, E) and Town Creek (B, D, F) where A and B are emergent wetland, C and D are forest, and E and F are water.

**Table S1.** Average difference in time (hrs:mins) between high tide at the NOAA tide gauge in Wilmington and instruments located in Smith Creek and Town Creek (August 10 to September 9, 2018).

| Site               | Average | Median | Max  | Min  | Range<br>(max-min) | Standard<br>Deviation |
|--------------------|---------|--------|------|------|--------------------|-----------------------|
| Smith Creek Lower  | 0:38    | 0:36   | 1:00 | 0:18 | 0:42               | 0:09                  |
| Smith Creek Middle | 0:45    | 0:48   | 1:12 | 0:12 | 1:00               | 0:11                  |
| Smith Creek Upper  | 1:34    | 1:36   | 2:00 | 1:00 | 1:00               | 0:13                  |
| Town Creek: Middle | 1:50    | 1:54   | 2:36 | 1:06 | 1:30               | 0:15                  |

**Table S2.** Average creek width (m) through time for Smith Creek and Town Creek.

|                |             | 1949 | 1956 | 1966 | 1980  | 1998 | 2010 | 2018 |
|----------------|-------------|------|------|------|-------|------|------|------|
| Smith<br>Creek | Whole Creek | 39.5 | 43.5 | 45.4 | 42.4  | 51.0 | 53.4 | 51.4 |
|                | Lower       | 50.6 | 55.2 | 56.8 | 55.6  | 61.7 | 63.2 | 63.8 |
|                | Middle      | 40.7 | 46.3 | 46.7 | 44.2  | 55.1 | 57.3 | 54.9 |
|                | Upper       | 23.2 | 24.3 | 28.1 | 22.7  | 30.7 | 31.8 | 28.2 |
|                |             | 1964 | 1980 | 1998 | 2010* | 2018 |      |      |
| Town Creek     | Whole Creek | 27.1 | 29.1 | 30.4 | 31.6  | 29.4 |      |      |
|                | Lower       | 35.2 | 38.5 | 38.7 | 39.7  | 38.9 |      |      |
|                | Lower-Mid   | 22.5 | 25.5 | 27.3 | 29.8  | 29.2 |      |      |
|                | Upper-Mid   | 19.6 | 21.4 | 23.1 | 22.9  | 21.1 |      |      |
|                | Upper       | 34.6 | 34.6 | 34.6 | 34.6  | 34.6 |      |      |

**Table S3.** Net change (%) between forest to emergent and emergent to water for each creek segment in Smith Creek.

| Land<br>Cover<br>Change | Time<br>Period | Lower             |                    | Middle            |                    | Upper             |                    |
|-------------------------|----------------|-------------------|--------------------|-------------------|--------------------|-------------------|--------------------|
|                         |                | <i>change (%)</i> | <i>rate (%/yr)</i> | <i>change (%)</i> | <i>rate (%/yr)</i> | <i>change (%)</i> | <i>rate (%/yr)</i> |
| Forest to<br>Emergent   | 1949–1956      | 2.26              | 0.32               | 0.00              | 0.00               | 0.00              | 0.00               |
|                         | 1956–1966      | -0.57             | 0.23               | 0.00              | 0.00               | 0.00              | 0.00               |
|                         | 1966–1980      | 0.82              | 0.06               | 1.59              | 0.11               | 0.00              | 0.00               |
|                         | 1980–1998      | 11.22             | 0.62               | 11.28             | 0.63               | 0.00              | 0.00               |
|                         | 1998–2018      | 4.61              | 0.23               | 12.94             | 0.65               | 6.87              | 0.34               |
|                         | Total          | 18.34             |                    | 25.82             |                    | 6.87              |                    |
| Emergent to<br>Water    | 1949–1956      | 0.77              | 0.11               | 0.00              | 0.00               | 0.00              | 0.00               |
|                         | 1956–1966      | 1.21              | 0.12               | 0.00              | 0.00               | 0.00              | 0.00               |
|                         | 1966–1980      | 0.27              | 0.02               | -0.22             | -0.02              | 0.00              | 0.00               |
|                         | 1980–1998      | 2.43              | 0.14               | 0.01              | 0.00               | 0.00              | 0.00               |
|                         | 1998–2018      | -1.06             | -0.05              | 0.34              | 0.02               | -0.76             | -0.04              |
|                         | Total          | 3.63              |                    | 0.13              |                    | -0.76             |                    |

**Table S4.** Net change (%) between forest to emergent and emergent to water for each creek segment in Town Creek.

| Land<br>Cover<br>Change | Time Period | Lower             |                    | Lower-Mid         |                    | Upper-Mid         |                    | Upper             |                    |
|-------------------------|-------------|-------------------|--------------------|-------------------|--------------------|-------------------|--------------------|-------------------|--------------------|
|                         |             | <i>change (%)</i> | <i>rate (%/yr)</i> |
| Forest to<br>Emergent   | 1964–1980   | 1.66              | 0.10               | 11.21             | 0.70               | 0.00              | 0.00               | 0.00              | 0.00               |
|                         | 1980–1998   | 1.13              | 0.06               | 29.92             | 1.66               | 2.73              | 0.15               | 0.00              | 0.00               |
|                         | 1998–2018   | 0.83              | 0.04               | 1.95              | 0.10               | 32.10             | 1.61               | 1.10              | 0.05               |
|                         | Total       | 3.63              |                    | 43.07             |                    | 34.83             |                    | 1.10              |                    |
| Emergent to<br>Water    | 1949–1956   | 2.34              | 0.15               | 0.03              | 0.00               | 0.00              | 0.00               | 0.00              | 0.00               |
|                         | 1980–1998   | 0.60              | 0.03               | 2.16              | 0.12               | -0.02             | 0.00               | 0.00              | 0.00               |
|                         | 1998–2018   | -2.41             | -0.12              | -0.25             | -0.01              | -1.32             | -0.07              | 0.00              | 0.00               |
|                         | Total       | 0.52              |                    | 1.94              |                    | -1.35             |                    | 0.00              |                    |
